# Supplementary material for: Cyanidin and delphinidin modulate inflammation and altered redox signaling improving insulin resistance in high fat-fed mice
Source: PubMed Central journal article supplement — Redox Biol. 2018 May 30;18:16–24. doi: 10.1016/j.redox.2018.05.012 (PMC6035912; doi:10.1016/j.redox.2018.05.012), 2018-05-30
Supplement: mmc1.pdf [file mmc1.pdf]

## Certificate of Analysis

### Nu Skin Enterprises/Pharmanex

 75 West Center Street  
 Provo Utah 84601 United States

|                            |                       |                          |                     |
|----------------------------|-----------------------|--------------------------|---------------------|
| <b>Sample Name:</b>        | <b>Blend AS#1</b>     | <b>Covance Sample:</b>   | <b>6580353</b>      |
| <b>Project ID</b>          | NU_SKIN-20171002-0072 | <b>Receipt Date</b>      | 03-Oct-2017         |
| <b>PO Number</b>           | CC_ON_FILE            | <b>Receipt Condition</b> | Ambient temperature |
| <b>Lot Number</b>          | 20171539              | <b>Login Date</b>        | 02-Oct-2017         |
| <b>Sample Serving Size</b> | 1 g                   | <b>Online Order</b>      | 658-E94D1CA         |
| <b>Description</b>         | Dark purple powder    |                          |                     |

| Analysis                                      | Result                  |
|-----------------------------------------------|-------------------------|
| <b>Fatty Acid Profile</b>                     |                         |
| Saturated Fatty Acids (Acid Form)             | 0.00063 g/Serving Size  |
| Total Cis Unsaturated Fatty Acids (Acid Form) | 0.00173 g/Serving Size  |
| Monounsaturated Fatty Acids (Acid Form)       | 0.00057 g/Serving Size  |
| Polyunsaturated Fatty Acids (Acid Form)       | 0.00116 g/Serving Size  |
| Trans Fatty Acids (Acid Form)                 | <0.00007 g/Serving Size |
| Total Fatty Acids                             | 0.00247 g/Serving Size  |
| <b>Carbohydrates</b>                          |                         |
| Total Carbohydrates                           | 0.879 g/Serving Size    |
| <b>Total Dietary Fiber</b>                    |                         |
| Total Dietary Fiber                           | 0.0291 g/Serving Size   |
| <b>Sugar Profile</b>                          |                         |
| Fructose                                      | 0.018 g/Serving Size    |
| Glucose                                       | 0.021 g/Serving Size    |
| Sucrose                                       | <0.001 g/Serving Size   |
| Lactose                                       | <0.001 g/Serving Size   |
| Maltose                                       | 0.002 g/Serving Size    |
| Galactose                                     | 0.005 g/Serving Size    |
| Total Sugar                                   | 0.046 g/Serving Size    |
| <b>Protein (N x 6.25) Dumas Method</b>        |                         |
| Protein                                       | 0.0722 g/Serving Size   |
| <b>Ash</b>                                    |                         |
| Ash                                           | 0.331 %                 |
| <b>Moisture by M100_T100</b>                  |                         |
| Moisture                                      | 4.34 %                  |

| Method References | Testing Location |
|-------------------|------------------|
|-------------------|------------------|

|                                                                                                                                                                       |                                       |
|-----------------------------------------------------------------------------------------------------------------------------------------------------------------------|---------------------------------------|
| <b>Ash (ASHM_S)</b><br><br>Official Methods of Analysis of AOAC INTERNATIONAL, 18th Ed., Method 923.03, AOAC INTERNATIONAL, Gaithersburg, MD, USA, (2005). (Modified) | <b>Covance Laboratories - Madison</b> |
|-----------------------------------------------------------------------------------------------------------------------------------------------------------------------|---------------------------------------|

|                                                                                                                                                    |                                       |
|----------------------------------------------------------------------------------------------------------------------------------------------------|---------------------------------------|
| <b>Carbohydrates (CHO)</b><br><br>United States Department of Agriculture, "Energy Value of Foods", Agriculture Handbook No. 74, pp. 2-11, (1973). | <b>Covance Laboratories - Madison</b> |
|----------------------------------------------------------------------------------------------------------------------------------------------------|---------------------------------------|

## Certificate of Analysis

### Nu Skin Enterprises/Pharmanex

75 West Center Street  
Provo Utah 84601 United States

#### Method References

#### Testing Location

##### Fatty Acid Profile (FALT\_S)

Covance Laboratories - Madison

Official Method No. 996.06, Official Methods of Analysis of the AOAC INTERNATIONAL (modified), 19th Ed., AOAC INTERNATIONAL: Gaithersburg, Maryland (2012).

Official Methods and Recommended Practices of the AOCS, Official methods Ce 2b-11 (2011), Ce 1h-05 (2009), Ce 1j-07 (2013), Ce 2-66 (2009), The American Oil Chemists' Society, Champaign, IL (modified).

##### Moisture by M100\_T100 (M100T100\_S)

Covance Laboratories - Madison

Official Methods of Analysis of AOAC INTERNATIONAL, 18th Ed., Methods 925.09 and 926.08, AOAC INTERNATIONAL, Gaithersburg, MD, USA, (2005). (Modified).

##### Protein (N x 6.25) Dumas Method (DGEN\_S)

Covance Laboratories - Madison

Official Methods of Analysis of AOAC INTERNATIONAL, 18th Ed., Methods 968.06 and 992.15, AOAC INTERNATIONAL, Gaithersburg, MD, USA, (2005). (Modified)

##### Sugar Profile (SUGN\_S)

Covance Laboratories - Madison

Mason, B. S., and Slover, H. T., "A Gas Chromatographic Method for the Determination of Sugars in Foods," Journal of Agricultural and Food Chemistry 19(3):551-554 (1971). (Modified)

Brobst, K. M., "Gas-Liquid Chromatography of Trimethylsilyl Derivatives, Methods in Carbohydrate Chemistry," 6:3-8, Academic Press, New York, NY, (1972). (Modified)

##### Total Dietary Fiber (TDFL\_S)

Covance Laboratories - Madison

Official Methods of Analysis of AOAC INTERNATIONAL 18th Ed., Method 991.43, AOAC INTERNATIONAL, Gaithersburg, MD, USA, (2005). (Modified)

#### Testing Location(s)

#### Released on Behalf of Covance by

##### Covance Laboratories - Madison

Edward Ladwig - Director

Covance Laboratories Inc.  
3301 Kinsman Blvd  
Madison WI 53704  
800-675-8375

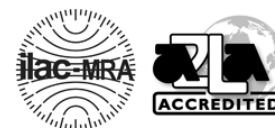

2918.01

These results apply only to the items tested. This certificate of analysis shall not be reproduced, except in its entirety, without the written approval of Covance.
